# Supplementary material
Source: PubMed Central journal article supplement (PMC5487645)
Supplement: AAC.00076-17_zac007176293s1.pdf [file AAC.00076-17_zac007176293s1.pdf]

## AAC00076-17 Supplemental Materials

**Table S1.** Antimicrobial resistance genes identified in the whole genome sequences of three *K. pneumoniae* isolates, in either chromosome (Chr) or plasmids

| Resistance Gene               | Phenotype                                     | CR14                            | NY9               | CN1               |
|-------------------------------|-----------------------------------------------|---------------------------------|-------------------|-------------------|
| <i>aacA4</i>                  |                                               | pCR14_2                         |                   |                   |
| <i>aac(3)-IIa</i>             |                                               | pCR14_2                         |                   | pCN1_1            |
| <i>aac(3)-IVa</i>             | Aminoglycoside resistance                     |                                 | Chr               |                   |
| <i>aac(6')-Ib</i>             |                                               | pCR14_4,<br>pCR14_5             | pNY9_2            | pCN1_2            |
| <i>aac(6')Ib-cr</i>           | Fluoroquinolone and aminoglycoside resistance | pCR14_2,<br>pCR14_4,<br>pCR14_5 | pNY9_2,<br>pNY9_3 | pCN1_1,<br>pCN1_2 |
| <i>aadA1</i>                  |                                               |                                 | Chr, pNY9_2       |                   |
| <i>aadA2</i>                  |                                               |                                 | Chr, pNY9_1       |                   |
| <i>aph(3')-Ia</i>             | Aminoglycoside resistance                     |                                 | pNY9_1            |                   |
| <i>aph(4)-Ia</i>              |                                               |                                 | Chr               |                   |
| <i>bla<sub>CTX-M-2</sub></i>  |                                               | pCR14_2                         |                   |                   |
| <i>bla<sub>CTX-M-15</sub></i> |                                               |                                 | pNY9_3            | Chr (x3)          |
| <i>bla<sub>KPC-2</sub></i>    |                                               | pCR14_3                         |                   | Chr               |
| <i>bla<sub>KPC-3</sub></i>    |                                               |                                 | pNY9_2            |                   |
| <i>bla<sub>OXA-1</sub></i>    |                                               |                                 | pNY9_3            | pCN1_1            |
| <i>bla<sub>OXA-2</sub></i>    | β-lactam resistance                           | pCR14_2                         |                   |                   |
| <i>bla<sub>OXA-9</sub></i>    |                                               | pCR14_3                         | pNY9_2            |                   |
| <i>bla<sub>SHV-11</sub></i>   |                                               |                                 | Chr               | Chr               |
| <i>bla<sub>TEM-1A</sub></i>   |                                               | pCR14_3                         | pNY9_2            |                   |
| <i>bla<sub>TEM-1B</sub></i>   |                                               | pCR14_2                         | pNY9_3            |                   |
| <i>catA1</i>                  |                                               | pCR14_1                         |                   |                   |
| <i>catB3</i>                  | Phenicol resistance                           |                                 | pNY9_3            | pCN1_1            |
| <i>cmlA1</i>                  |                                               |                                 | Chr               |                   |
| <i>dfrA12</i>                 |                                               |                                 | pNY9_1            |                   |
| <i>dfrA14</i>                 | Trimethoprim resistance                       |                                 | pNY9_2            | pCN1_1            |
| <i>fosA</i>                   | Fosfomycin resistance                         |                                 |                   | Chr               |
| <i>mph(A)</i>                 | Macrolide resistance                          | pCR14_1                         | pNY9_1            |                   |
| <i>oqxAB</i>                  |                                               | Chr                             | Chr               | Chr               |
| <i>QnrB66</i>                 | Quinolone resistance                          |                                 |                   | pCN1_1            |
| <i>sul1</i>                   |                                               | pCR14_2 (x2)                    | pNY9_1            |                   |
| <i>sul2</i>                   | Sulfonamide resistance                        |                                 | pNY9_2            |                   |
| <i>sul3</i>                   |                                               |                                 | Chr               |                   |
| <i>strAB</i>                  | Aminoglycoside resistance                     |                                 | pNY9_2            |                   |
| <i>tet(A)</i>                 | Tetracycline resistance                       |                                 | pNY9_3            | pCN1_1            |

**Table S2.** Antimicrobial susceptibility profiles of the three *K. pneumoniae* isolates

| Antimicrobial agent           | MIC ( $\mu\text{g/mL}$ ) (interpretation) for isolate <sup>a</sup> |           |           |
|-------------------------------|--------------------------------------------------------------------|-----------|-----------|
|                               | CR14                                                               | NY9       | CN1       |
| Ampicillin                    | >16 (R)                                                            | >16 (R)   | >16 (R)   |
| Cefoxitin                     | >32 (R)                                                            | >32 (R)   | >32 (R)   |
| Cefotaxime                    | >256 (R)                                                           | >256 (R)  | >256 (R)  |
| Ceftazidime                   | 96 (R)                                                             | >256 (R)  | 64 (R)    |
| Ciprofloxacin                 | >2 (R)                                                             | >2 (R)    | >2 (R)    |
| Levofloxacin                  | >4 (R)                                                             | >4 (R)    | >4 (R)    |
| Meropenem                     | 32 (R)                                                             | 32 (R)    | 32 (R)    |
| Imipenem                      | 32 (R)                                                             | 8 (R)     | 8 (R)     |
| Gentamicin                    | >8 (R)                                                             | >8 (R)    | >8 (R)    |
| Tetracycline                  | $\leq 4$ (S)                                                       | >8 (R)    | >8 (R)    |
| Trimethoprim-sulfamethoxazole | >2/38 (R)                                                          | >2/38 (R) | >2/38 (R) |
| Tigecycline                   | 3.0 (I)                                                            | 2.0 (S)   | 1.5 (S)   |
| Colistin <sup>b</sup>         | 0.19 (S)                                                           | 0.125 (S) | 0.094 (S) |

<sup>a</sup> MIC: minimum inhibitory concentration; R: resistant; I: intermediate; S: susceptible.

<sup>b</sup> No clinical breakpoint has been defined by the Clinical and Laboratory Standards Institute; we thus utilized the European breakpoint ( $S \leq 2\mu\text{g/mL}$ ) published by the European Committee on Antimicrobial Susceptibility Testing for *Enterobacteriaceae*.

**Table S3.** Whole-genome comparison of two *K. pneumoniae* isolates, CN1 and KPNIH31

| Genome composition for isolate |        |           |              |           |
|--------------------------------|--------|-----------|--------------|-----------|
|                                |        | CN1 (bp)  | KPNIH31 (bp) |           |
| Chromosome                     |        | 5,237,856 |              | 5,228,295 |
| Plasmids                       | pCN1_1 | 182,846   | pKPN-c22     | 178,563   |
|                                | pCN1_2 | 15,100    | pAAC154-a9e  | 15,100    |
|                                | -      | -         | pKPN-852     | 51,622    |

**Table S4.** Characteristics of CRISPR-*cas* system along with  $\beta$ -lactamase-encoding genes in chromosomes of 22 *K. pneumoniae* strains with complete genome sequences available from GenBank

| No. | Strain              | Collection Date | Location        | CRISPR-<br><i>cas</i> | Start   | End     | Spacers | Chromosomal<br>$\beta$ -lactamase |
|-----|---------------------|-----------------|-----------------|-----------------------|---------|---------|---------|-----------------------------------|
| 1   | NTUH-K2044          | 1996-2001       | Taiwan, China   | CRISPR                | 3001234 | 3002603 | 22      | SHV-36                            |
|     |                     |                 |                 | <i>cas</i> operon     | 3002651 | 3010944 |         |                                   |
|     |                     |                 |                 | CRISPR                | 3011356 | 3011567 | 3       |                                   |
| 2   | 1084                | N/A             | Taiwan, China   | CRISPR                | 2319792 | 2320306 | 8       | SHV-36                            |
|     |                     |                 |                 | <i>cas</i> operon     | 2320939 | 2329014 |         |                                   |
|     |                     |                 |                 | CRISPR                | 2329062 | 2329943 | 14      |                                   |
| 3   | ATCC 43816<br>KPPR1 | N/A             | USA             | CRISPR                | 383812  | 384388  | 9       | SHV-1                             |
|     |                     |                 |                 | <i>cas</i> operon     | 385020  | 393094  |         |                                   |
|     |                     |                 |                 | CRISPR                | 393142  | 393666  | 8       |                                   |
| 4   | U25                 | 2010/10         | Chennai, India  | CRISPR                | 3265852 | 3266619 | 12      | SHV-28;<br>OXA-1                  |
|     |                     |                 |                 | <i>cas</i> operon     | 3266667 | 3274960 |         |                                   |
|     |                     |                 |                 | CRISPR                | 3275372 | 3275950 | 9       |                                   |
| 5   | PMK1                | 2011/8          | Nepal           | CRISPR                | 4766150 | 4766857 | 11      | SHV-28;<br>CTX-M-15               |
|     |                     |                 |                 | <i>cas</i> operon     | 4766905 | 4775198 |         |                                   |
|     |                     |                 |                 | CRISPR                | 4775610 | 4776005 | 6       |                                   |
| 6   | PittNDM01           | 2013/3          | PA, USA         | CRISPR                | 1170138 | 1170905 | 12      | SHV-28;<br>OXA-1                  |
|     |                     |                 |                 | <i>cas</i> operon     | 1170953 | 1179246 |         |                                   |
|     |                     |                 |                 | CRISPR                | 1179658 | 1180236 | 9       |                                   |
| 7   | KP617               | 2013/5          | Seoul, Korea    | CRISPR                | 554714  | 555292  | 9       | SHV-28;<br>OXA-1                  |
|     |                     |                 |                 | <i>cas</i> operon     | 555704  | 565197  |         |                                   |
|     |                     |                 |                 | CRISPR                | 565245  | 566012  | 12      |                                   |
| 8   | J1                  | 2014/10         | Harbin, China   | CRISPR                | 5072070 | 5073012 | 15      | SHV-11                            |
|     |                     |                 |                 | <i>cas</i> operon     | 5073060 | 5081353 |         |                                   |
|     |                     |                 |                 | CRISPR                | 5081766 | 5082220 | 7       |                                   |
| 9   | NUHL24835           | 2014/9          | Jiangxi, China  | CRISPR                | 539827  | 540405  | 9       | SHV-28                            |
|     |                     |                 |                 | <i>cas</i> operon     | 540817  | 549110  |         |                                   |
|     |                     |                 |                 | CRISPR                | 549158  | 550108  | 15      |                                   |
| 10  | RJF293              | 2014/9          | Shanghai, China | CRISPR                | 2991230 | 2991753 | 8       | SHV-1                             |
|     |                     |                 |                 | <i>cas</i> operon     | 2991801 | 3001158 |         |                                   |
|     |                     |                 |                 | CRISPR                | 3001570 | 3001903 | 5       |                                   |

|    |          |         |                    |                   |         |         |    |                                         |
|----|----------|---------|--------------------|-------------------|---------|---------|----|-----------------------------------------|
| 11 | RJF999   | 2015/1  | Shanghai,<br>China | CRISPR            | 3052030 | 3053704 | 27 | SHV-36                                  |
|    |          |         |                    | <i>cas</i> operon | 3053752 | 3062045 |    |                                         |
|    |          |         |                    | CRISPR            | 3062458 | 3063035 | 9  |                                         |
| 12 | Kp52.145 | N/A     | France             | <i>cas</i> operon | 1035623 | 1044066 |    | -                                       |
|    |          |         |                    | CRISPR            | 1044163 | 1044802 | 10 |                                         |
|    |          |         |                    | CRISPR            | 1044875 | 1045391 | 8  |                                         |
| 13 | SKGH01   | 2015    | UAE                | <i>cas</i> operon | 829985  | 838428  |    | CTX-M-15;<br>SHV-11;<br>OXA-181<br>(×3) |
|    |          |         |                    | CRISPR            | 840433  | 843082  | 43 |                                         |
| 14 | AATZP    | 2014    | MD,<br>USA         | CRISPR            | 4233882 | 4236531 | 43 | SHV-11                                  |
|    |          |         |                    | <i>cas</i> operon | 4236628 | 4245071 |    |                                         |
| 15 | MS6671   | 2014/4  | UAE                | CRISPR            | 4302572 | 4305160 | 43 | CTX-M-15;<br>SHV-11;<br>OXA-181<br>(×3) |
|    |          |         |                    | <i>cas</i> operon | 4305318 | 4313761 |    |                                         |
| 16 | KPNIH31  | 2013/12 | MD,<br>USA         | CRISPR            | 4112616 | 4114960 | 39 | SHV-11;<br>KPC-2; CTX-<br>M-15 (×2)     |
|    |          |         |                    | <i>cas</i> operon | 4115118 | 4123561 |    |                                         |
| 17 | CN1      | 2013    | NY, USA            | <i>cas</i> operon | 1060505 | 1068948 |    | SHV-11;<br>KPC-2; CTX-<br>M-15 (×3)     |
|    |          |         |                    | CRISPR            | 1069045 | 1071450 | 39 |                                         |
| 18 | TGH10    | 2013/3  | Greece             | <i>cas</i> operon | 1059346 | 1067789 |    | SHV-1                                   |
|    |          |         |                    | CRISPR            | 1067886 | 1069375 | 24 |                                         |
| 19 | KPNIH27  | 2012/1  | MD,<br>USA         | CRISPR            | 4177526 | 4179930 | 39 | SHV-26                                  |
|    |          |         |                    | <i>cas</i> operon | 4180027 | 4188469 |    |                                         |
| 20 | TGH8     | 2011/6  | Greece             | <i>cas</i> operon | 1161154 | 1169597 |    | -                                       |
|    |          |         |                    | CRISPR            | 1169694 | 1171183 | 24 |                                         |
| 21 | CAV1344  | 2010/12 | VA, USA            | <i>cas</i> operon | 3283434 | 3291877 |    | SHV-11                                  |
|    |          |         |                    | CRISPR            | 3291974 | 3294561 | 42 |                                         |
| 22 | CAV1193  | 2010/5  | VA, USA            | <i>cas</i> operon | 3303580 | 3312023 |    | SHV-11                                  |
|    |          |         |                    | CRISPR            | 3312120 | 3314707 | 42 |                                         |

Subtype (a): 1-11; Subtype (b): 12-22.

**Table S5.** Chromosomal  $\beta$ -lactamase genes in 42 *K. pneumoniae* strain without CRISPR-*cas* in the chromosomes based on complete genome sequences available from GenBank

| Strain    | Collection year  | Location      | Chromosomal <i>bla</i>  |
|-----------|------------------|---------------|-------------------------|
| 342       | N/A <sup>a</sup> | N/A           | LEN22                   |
| 1158      | 2002             | Taiwan        | SHV-11                  |
| 32192     | 2010             | United States | SHV-11                  |
| 34618     | 2011             | United States | SHV-11                  |
| 234-12    | 2011             | Germany       | SHV-43                  |
| 30660     | 2010             | United States | -                       |
| 30684     | 2010             | United States | SHV-11                  |
| 500_1420  | 2012             | United States | SHV-11                  |
| MGH 78578 | 1994             | N/A           | SHV-11                  |
| BAA-2146  | 2010             | United States | SHV-11, CTX-M-15        |
| blaNDM-1  | 2012             | United States | SHV-11                  |
| CAV1392   | 2011             | United States | SHV-11, CTX-M-15, KPC-3 |
| CAV1596   | 2012             | United States | SHV-11                  |
| CG43      | N/A              | Taiwan        | SHV-1                   |
| CR14      | 2013             | United States | -                       |
| DMC1097   | 2010             | United States | SHV-11                  |
| HK787     | N/A              | N/A           | SHV-1                   |
| HKUOPLC   | 2013             | Hong Kong     | OKP-B-6                 |
| HS11286   | N/A              | N/A           | SHV-11                  |
| JM45      | 2010             | N/A           | SHV-11                  |
| KCTC 2242 | N/A              | N/A           | SHV-99                  |
| KP-1      | N/A              | Australia     | SHV-187                 |
| Kp13      | 2009             | Brazil        | SHV-11                  |
| KpN01     | 2013             | Canada        | SHV-27                  |
| KpN06     | 2013             | Canada        | SHV-27                  |
| Kpn223    | 2013             | United States | SHV-11                  |
| Kpn555    | 2014             | United States | SHV-1                   |
| KPNIH1    | 2011             | United States | SHV-11                  |
| KPNIH10   | 2011             | United States | SHV-11                  |
| KPNIH24   | 2012             | United States | SHV-11                  |
| KPNIH29   | 2013             | United States | SHV-1                   |
| KPNIH30   | 2013             | United States | SHV-11                  |
| KPNIH32   | 2013             | United States | SHV-11                  |
| KPNIH33   | 2013             | United States | SHV-11, KPC-3 x2        |

|         |      |               |        |
|---------|------|---------------|--------|
| KPNIH39 | 2014 | United States | SHV-11 |
| KPR0928 | 2012 | United States | SHV-11 |
| NY9     | 2013 | United States | SHV-11 |
| UHKPC07 | 2007 | United States | SHV-11 |
| UHKPC33 | 2008 | United States | SHV-11 |
| W14     | 2014 | China         | SHV-1  |
| XH209   | 2013 | China         | SHV-11 |
| YH43    | N/A  | N/A           | LEN22  |

---

<sup>a</sup> N/A: data not available.

**Table S6.** Spacer sequences in the CRISPR-*cas* array of *K. pneumoniae* CN1 and the number of their targeting plasmids from BLASTn homology search as of June 2016

| No. | Position                  | Length | Spacer sequence                    | No. of Target Plasmids      |
|-----|---------------------------|--------|------------------------------------|-----------------------------|
| 1   | 1069074                   | 32     | GAGCAGGCACCCGCCGCAACGACGAAGAGCGC   | 210                         |
| 2   | 1069135                   | 32     | AAATCAGCCAGCACCACGATTCTGGGAAATTT   |                             |
| 3   | 1069196                   | 32     | ACAGGCTTACCCGTATTGAGACGGTTGCTGAA   |                             |
| 4   | 1069257                   | 33     | GAAACCCCATCAGATGACCCTCCCCATGTTGGC  |                             |
| 5   | 1069319                   | 32     | TTGCCTGGTCTGCTTGGTGATGATCCGTGGTA   |                             |
| 6   | 1069380                   | 32     | TACAGAACGACTGAGGCGGGCGTGTATTGCATA  |                             |
| 7   | 1069441                   | 32     | GATCTTAACTCTATTGCCAATGGCGCAATTCA   |                             |
| 8   | 1069502                   | 32     | GGCGATGCGCGCTCTGCTGGCTATCGGTAAAA   |                             |
| 9   | 1069563                   | 32     | AATGCAGCAACCGGCAAATATATCGCCGGTAA   |                             |
| 10  | 1069624                   | 32     | GGGCTGCCGCACGCCTGGGACGAGTCGAGCCC   |                             |
| 11  | 1069685                   | 32     | CCGCAATAACAAAAATAAATGAGGGTTAAAGT   |                             |
| 12  | 1069746                   | 32     | GTAATGGGAATGAGTAGAAGAGCGTCATTGG    |                             |
| 13  | 1069807                   | 32     | CCCCCGCGCACATGCTTAAACGCGCTATCACG   | 1 ( <i>E. coli</i> pV139-c) |
| 14  | 1069868                   | 32     | GGCATCTGTTGTGTAATGTTGAGTTTTTTTCA   |                             |
| 15  | 1069929                   | 32     | CAGGTAAACATGTAAAAAATGACCGTCGCCG    |                             |
| 16  | 1069990                   | 32     | CACATTGCCCGGTCTGAAAAGTATTTGAAAAT   |                             |
| 17  | 1070051                   | 32     | TCCGCACAGTCAAACGCTCCAGACACCAACCC   |                             |
| 18  | 1070112                   | 32     | CCGGAACACCACCAGTAACAGCTACTGTAGGC   |                             |
| 19  | 1070173                   | 32     | TGACCCTGTTGATTTTGTTCAGGTAATACGT    |                             |
| 20  | 1070234                   | 32     | TTAACCTCGTCGTTCTGGTTTTCCGCCCAGGAT  |                             |
| 21  | 1070295                   | 32     | GAACCTGAATTCTGAAGGGTGGGTTCATCCTTC  |                             |
| 22  | 1070356                   | 32     | GGACCCCGAGCGACCCGGTCACCCTCCGACCT   |                             |
| 23  | 1070417                   | 32     | CCGTGCAACGGCGGTTATATCCATCTTGAGTC   |                             |
| 24  | 1070478                   | 32     | ACCGATCCCACAATTGCGGCGGTTGAGATTGA   |                             |
| 25  | 1070539                   | 32     | GTTGGTAATTACTGCTGTGTGTTACGGATAAAA  |                             |
| 26  | 1070600                   | 32     | CCGATTGTCTGGCGGTCGAGCGCCATTTGCTC   |                             |
| 27  | 1070661                   | 32     | TGCCGGACGTTGTACCTGTGAGTTAATTCTTC   |                             |
| 28  | 1070722                   | 32     | CGATAACCGGGCGTTTTCGACTGAACTCACCTC  | 71                          |
| 29  | 1070783                   | 32     | TTAATACCAGGGGGCAGGTTTACGAGGTCCCC   | 31                          |
| 30  | 1070844                   | 32     | CCGCTTTAACCCGCTCCGGCAGATCCGGGTGA   |                             |
| 31  | 1070905                   | 32     | CCCTCCGCTTTCAGGGTGTGGCTGATATCACC   |                             |
| 32  | 1070966                   | 32     | CGCGCTGCGAATTTGTTGGTTCGATTTTCGATCT |                             |
| 33  | 1071027                   | 32     | TGGGTAGAGGTTAACTGGTTATTGGTCATTGA   |                             |
| 34  | 1071088                   | 32     | ATCGCGGAGGCCTTCGGTGTGTCTCTTTCCCTG  |                             |
| 35  | 1071149                   | 32     | CCGTTGTCAATATCTCCCGCGTCCGCGCCAG    |                             |
|     | AATZP<br>SKGH01<br>MS6671 | 32     | CACGTCCGGAAACCACGGGTTATCCGTGTAAT   |                             |
|     |                           | 32     | CAGAGGTCCTTATCTTTTCAACGTCAAAGTCG   |                             |
|     |                           | 32     | GCAATCCCAGAGCGCGAATATCTTGGGCTCTC   |                             |
|     |                           | 32     | GACATGGCGCGCGAGTTTATCGACGCCTGCGC   |                             |
| 36  | 1071210                   | 32     | GGGATGAGCGTTTTCCGGTGGATTCTGATGTG   |                             |
| 37  | 1071271                   | 32     | GTGATCGTCATGGATATCACTGCCGTTCCGTC   |                             |
| 38  | 1071332                   | 32     | CAGACAGACAGCAGGCAGCAAACAGGGAAGAC   | 112                         |
| 39  | 1071393                   | 29     | GGGTTCACTTGGGTGAAACTGAACTAACT      |                             |
